# Supplementary material
Source: publisher figshare collection journal article supplement (https://karger.figshare.com/articles/dataset/_/25398643)
Supplement: Supplementary file 1 [file 6]

**Figure S1.** Disposition of participants in MAD cohorts

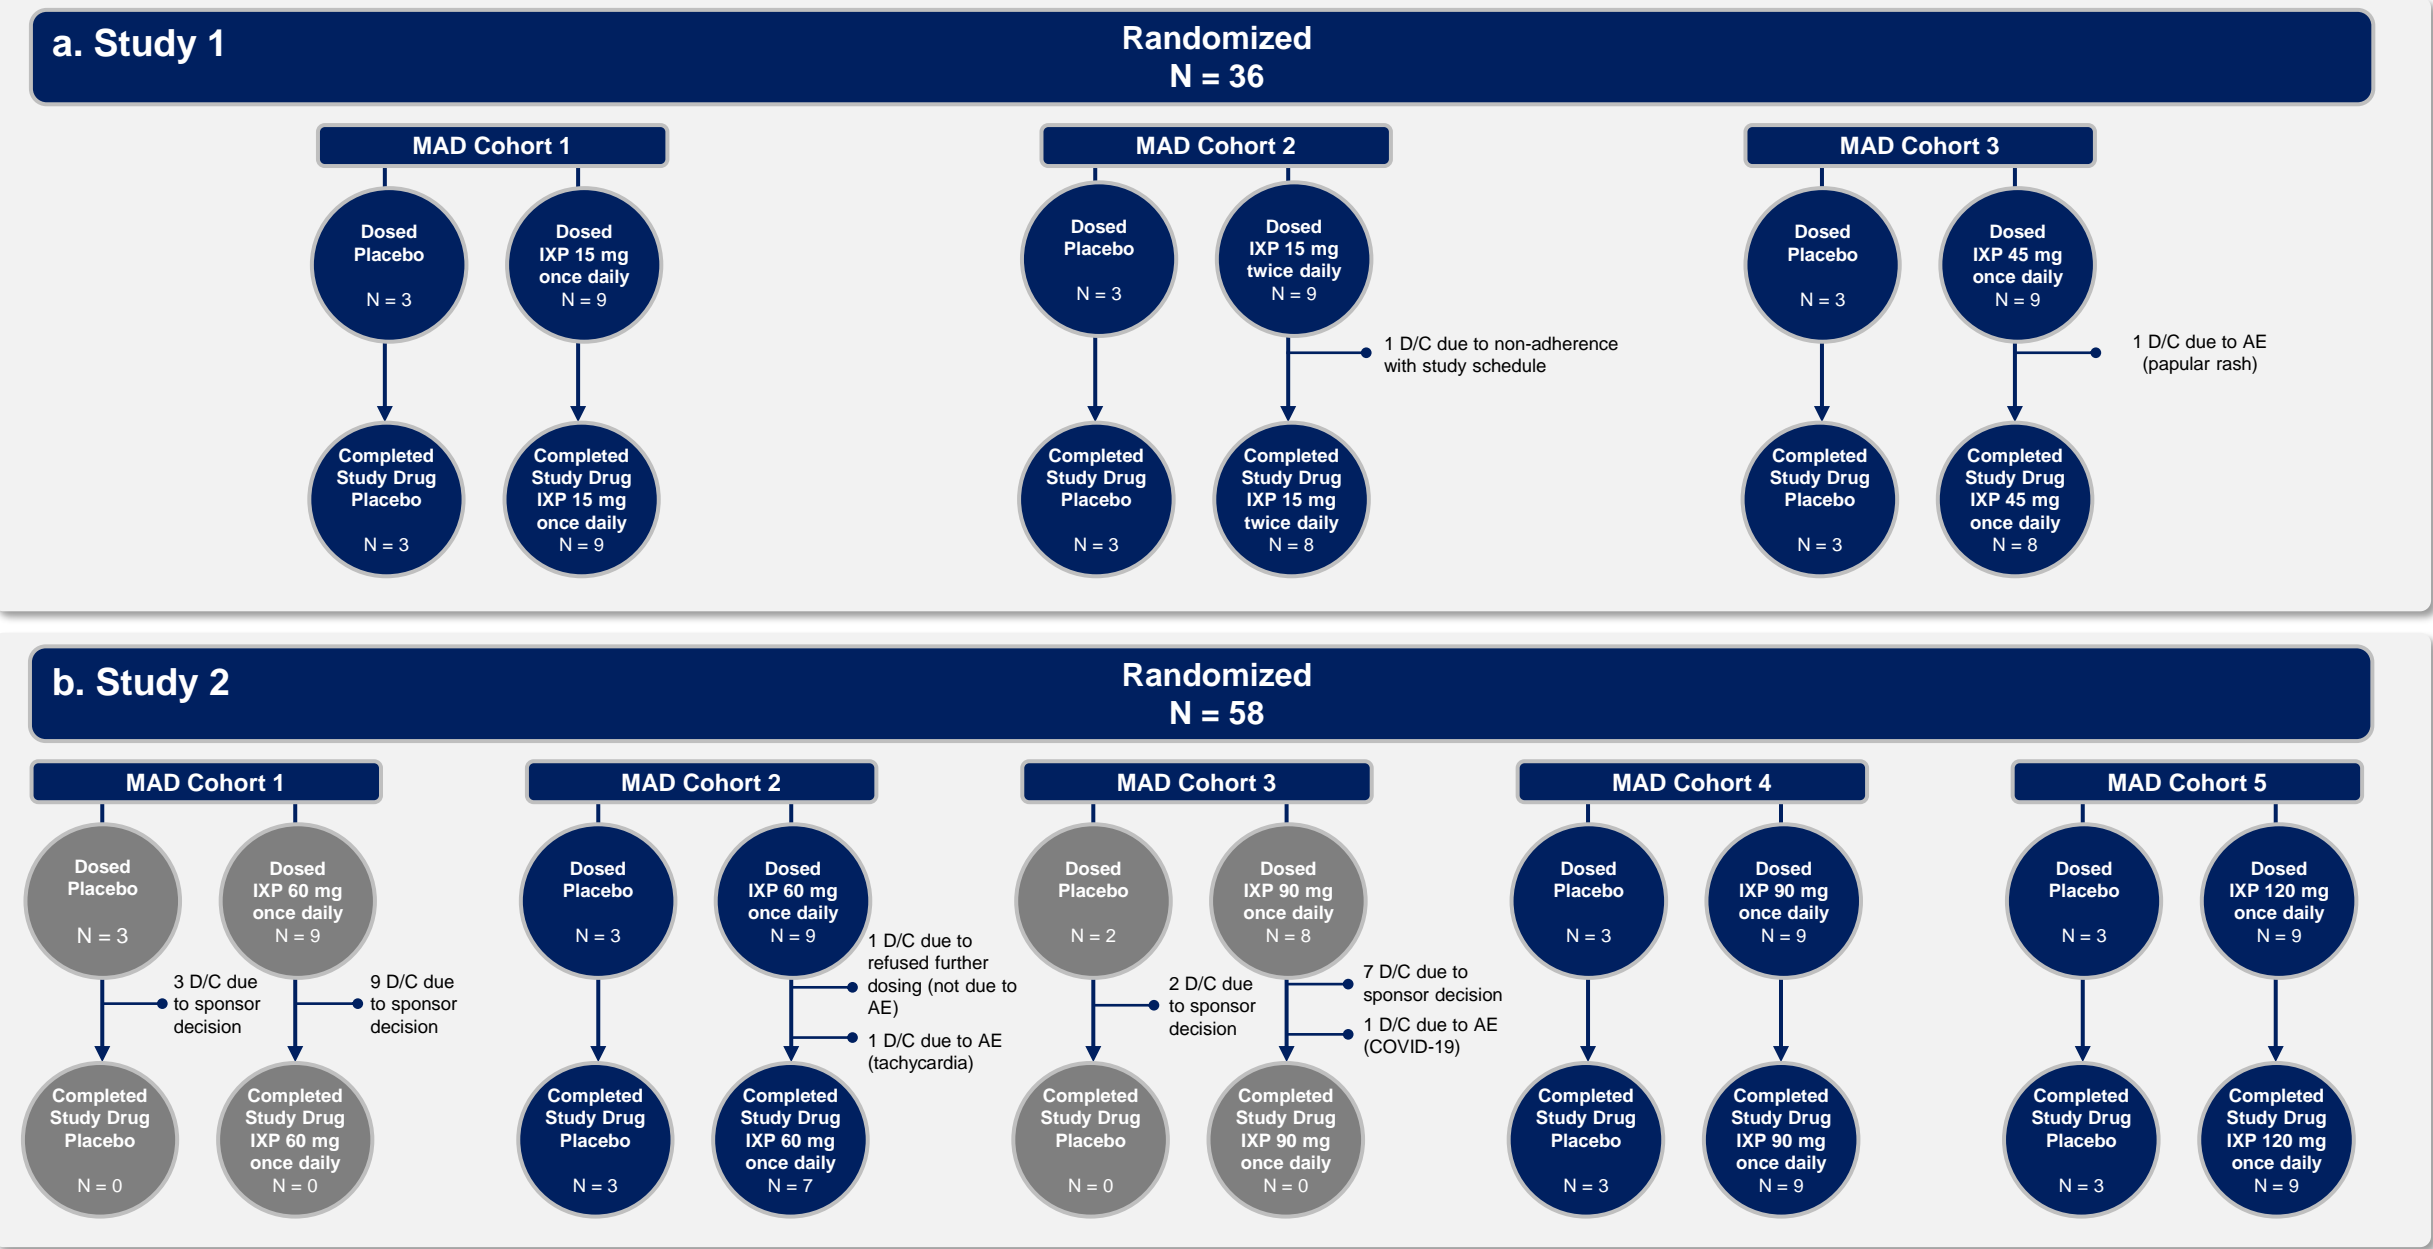

AE: adverse event; D/C: discontinuation; IXP: inaxaplin

Panel A shows the disposition of participants in the MAD cohorts in Study 1 and Panel B shows the disposition of participants in the MAD cohorts in Study 2. Two cohorts in Study 2 (gray) were prematurely discontinued due to sponsor decision.
